# Supplementary material
Source: PubMed Central journal article supplement (PMC3023608)
Supplement: gmic0104_0269SD1.pdf [file gmic0104_0269SD1.pdf]

# In-depth genetic analysis of *Clostridium difficile* PCR-ribotype 027 strains reveals high genome fluidity including point mutations and inversions

Richard A. Stabler,<sup>1</sup> Esmeralda Valiente,<sup>1</sup> Lisa F. Dawson,<sup>1</sup> Miao He,<sup>2</sup> Julian Parkhill<sup>2</sup> and Brendan W. Wren<sup>1,\*</sup>

<sup>1</sup>London School of Hygiene and Tropical Medicine; London, UK; <sup>2</sup>Wellcome Trust Sanger Institute; Cambridge, UK

## Supplementary Material

**Key words:** *Clostridium difficile*, 027 ribotype, point mutations, inversions, hypervirulence

Submitted: 01/28/10

Revised: 03/09/10

Accepted: 03/16/10

Previously published online:

[www.landesbioscience.com/journals/gut-microbes/article/11870](http://www.landesbioscience.com/journals/gut-microbes/article/11870)

\*Correspondence to: Brendan W. Wren;

Email: [Brendan.Wren@lshtm.ac.uk](mailto:Brendan.Wren@lshtm.ac.uk)

Addendum to: Stabler RA, He M, Dawson L, Martin M, Valiente E, Corton C, et al. Comparative genome and phenotypic analysis of *Clostridium difficile* 027 strains provides insight into the evolution of a hypervirulent bacterium. *Genome Biol* 2009; 10:102; PMID: 19781061; DOI: 10.1186/gb-2009-10-9-r102.

```

CDR20291_1234    ATGCTAGGTGAAAAGATGAGAAATATAAGAAAAAGCAAGAAAAAACATTAAGTGATGTT 60
CD196_1256       ATGCTAGGTGAAAAGATGAGAAATATAAGAAAAAGCAAGAAAAAACATTAAGTGATGTT 60
630_CD1388       ATGCTAGGTGAAAAGATGAGAAATATAAGAAAAAGCAAGAAAAAACATTAAGTGATGTT 59
*****

CDR20291_1234    TCCAAATTGACAGATTTATCTATAAGTTATATCTCTCAAATAGAAAGAGATGCTATTGAA 120
CD196_1256       TCCAAATTGACAGATTTATCTATAAGTTATATCTCTCAAATAGAAAGAGATGCTATTGAA 120
630_CD1388       TCCAAATTGACAGATTTATCTATAAGTTATATCTCTCAAATAGAAAGAGATGCTATTGAA 119
*****

CDR20291_1234    CCATCCTTGTCTTCATTGAGAAAAATCGCTGAAGTTTTAGACACTCCTTTATATATGTTT 180
CD196_1256       CCATCCTTGTCTTCATTGAGAAAAATCGCTGAAGTTTTAGACACTCCTTTATATATGTTT 180
630_CD1388       CCATCCTTGTCTTCATTGAGAAAAATCGCTGAAGTTTTAGACACTCCTTTATATATGTTT 179
*****

CDR20291_1234    ATGGATGACAATAATACTGATGATTTAGTAATTAGAAAAGAAGATAGAGTTATGATGAAA 240
CD196_1256       ATGGATGACAATAATACTGATGATTTAGTAATTAGAAAAGAAGATAGAGTTATGATGAAA 240
630_CD1388       ATGGATGACAATAATACTGATGATTTAGTCATTAGAAAAGAAGATAGAGTTATGATGAAA 239
*****

CDR20291_1234    TTTCCAAAGAGTGAAATGTTTTACGAGATAGTATCTCCAATGCCTACAACCTGAATTTACA 300
CD196_1256       TTTCCAAAGAGTGAAATGTTTTACGAGATAGTATCTCCAATGCCTACAACCTGAATTTACA 300
630_CD1388       TTTCCAAAGAGTGAAATGTTTTACGAGATAGTATCTCCAATGCCTACAACCTGAGTTTACA 299
*****

CDR20291_1234    CCTTCAATTTTATTTGTAGAGTTTGAACCTAAACCAGAAAGTGAGGATGCTAAAGATTAT 360
CD196_1256       CCTTCAATTTTATTTGTAGAGTTTGAACCTAAACCAGAAAGTGAGGATGCTAAAGATTAT 360
630_CD1388       CCTTCAATTTTATTTGTAGAGTTTGAACCTAAACCAGAAAGTGAGGATGCCAAAGATTAT 359
*****

CDR20291_1234    ATCTATCATGCATCAGAAGAAATTATGGTGGTAACGAGTGGTGTGGTTGATATTTGTATG 420
CD196_1256       ATCTATCATGCATCAGAAGAAATTATGGTGGTAACGAGTGGTGTGGTTGATATTTGTATG 420
630_CD1388       ATATATCATGCATCAGAAGAAATTATGGTGGTAACGAGTGGTGTGGTTGATATTTGTACG 419
** *****

CDR20291_1234    GGTGAAAAGGTAGTTAGATTTAAATCCAGGTGACTCAACATTTATAAAAGCTAATGTACCA 480
CD196_1256       GGTGAAAAGGTAGTTAGATTTAAATCCAGGTGACTCAACATTTATAAAAGCTAATGTACCA 480
630_CD1388       GGTGAAAAGGTAGTTAGATTTAAATCCAGGTGACTCAACATTTATAAAAGCTAATGTACCA 479
*****

CDR20291_1234    CATAAAATCATCAATCCAAGTAAAGATACAATAGCTCGTGGATATGGAGTTATATCACCT 540
CD196_1256       CATAAAATCATCAATCCAAGTAAAGATACAATAGCTCGTGGATATGGAGTTATATCACCT 540
630_CD1388       CATAAAATCATCAATCCAAGTAAAGATACAATAGCTCGTGGATATGGAGTTATATCACCT 539
*****

CDR20291_1234    CCAATTTGGCCAATAAAATCTAAATAA 567
CD196_1256       CCAATTTGGCCAATAAAATCTAAATAA 567
630_CD1388       CCAATTTGGCCAATAAAATCTAAATAA 566
*****

```

```

CDR20291_1656      MEYYIVDSFATKLFKGNPAGVCVLDRIIPLELMQKIAEENLPETAFVVKGKGNLYELRWF 60
CD196_1681         MEYYIVDSFATKLFKGNPAGVCVLDRIIPLELMQKIAEENLPETAFVVKGKGNLYELRWF 60
630_CD1761         MEYYIVDSFATKLFKGNPAGVCVLDRIIPLELMQKIAEENLPETAFVVKGKGNLYELRWF 60
*****

CDR20291_1656      TPKAEIDLCGHATLAAAYVISNFIDVNVKRIDFFFTQSGKLEVTRNGNLYEMIFPEIMPIE 120
CD196_1681         TPKAEIDLCGHATLAAAYVISNFIDVNVKRIDFFFTQSGKLEVTRNGNLYEMIFPEIMPIE 120
630_CD1761         TPKAEIDLCGHATLAAAYVISNFIDVNVKRIDFFFTQSGKLEVTRNGNLYEMIFPEIMPIE 120
*****

CDR20291_1656      IELSP#QANLIGCVPSAVYSSRDLLLLLNSEQEVINYKPNYAQLRKLTDWLGIIITPQGS 179
CD196_1681         IELSP#QANLIGCVPSAVYSSRDLLLLLNSEQEVINYKPNYAQLRKLTDWLGIIITPQGS 179
630_CD1761         IELSPQANLIGCVPSAVYSSRDLLLLLNSEQEVINYKPNYAQLRKLTDWLGIIITPQGS 180
*****

CDR20291_1656      NTDFVSRYFCPELDSVPVTGSSHCNFIIPYWSEKLGKHKMVAQLSNRGGIIQCEVLKDN 239
CD196_1681         NTDFVSRYFCPELDSVPVTGSSHCNFIIPYWSEKLGKHKMVAQLSNRGGIIQCEVLKDN 239
630_CD1761         NTDFVSRYFCPELDSVPVTGSSHCNLIIPYWSEKLGKHKMVAQLSNRGGIIQCEVLKDN 240
*****

CDR20291_1656      TVKISGEAVLFMQGTIKIDI 259
CD196_1681         TVKISGEAVLFMQGTIKIDI 259
630_CD1761         TVKISGEAVLFMQGTIKIDI 260
*****

```
